# Supplementary material for: Transcriptome analysis-identified long noncoding RNA CRNDE in maintaining endothelial cell proliferation, migration, and tube formation
Source: PubMed Central journal article supplement (PMC6925215; doi:10.1038/s41598-019-56030-9), 2019-12-20
Supplement: 41598_2019_56030_MOESM1_ESM.pdf [file 41598_2019_56030_MOESM1_ESM.pdf]

**Transcriptome analysis-identified long noncoding RNA CRNDE in maintaining endothelial cell proliferation, migration, and tube formation**

Matthew Moran<sup>1</sup>, Xiao Cheng<sup>1</sup>, Mohamed Sham Shihabudeen Haider Ali<sup>1</sup>, Nishikant Wase<sup>1</sup>,  
Nghì Nguyen<sup>1</sup>, Weilong Yang<sup>2</sup>, Chi Zhang<sup>2</sup>, Concetta DiRusso<sup>1,3</sup>, and Xinghui Sun<sup>1,4,\*</sup>

1. Department of Biochemistry, University of Nebraska - Lincoln, Lincoln, Nebraska 68588, USA.
2. Center for Plant Science Innovation, School of Biological Sciences, University of Nebraska - Lincoln, Lincoln, Nebraska 68588, USA.
3. Nebraska Center for Integrated Biomolecular Communication, University of Nebraska - Lincoln, Lincoln, Nebraska 68588, USA.
4. Nebraska Center for the Prevention of Obesity Diseases through Dietary Molecules, University of Nebraska - Lincoln, Lincoln, Nebraska 68588, USA.

\* To whom correspondence can be addressed. Tel [+1 402 472 8898]; email: xsun17@unl.edu.

## Supplementary Methods

### CRNDE promoter construction

The 1761 base pairs proximal to the transcription start site of CRNDE (1718 base pairs upstream of *Crnde* gene and 43 base pairs of 5' *Crnde* gene) were amplified by qPCR from human genomic DNA and considered as its promoter (Supplementary Figure 3B). This sequence was cloned into the pGL3-basic vector (Promega Cat. No. E1751) upstream of luciferase to create pGL3-CRNDE pro. Primers are: forward 5'- AATGGTACCGGGGGCTCTGCTTTTGCC-3' and reverse 5'- ACAAAGCTTAGCCAGCTTCCCGTCTCCAT-3'.

### Promoter activity assay

HUVECs were seeded into a 12-well plate and transfected at 90% confluency with either control pGL3-basic vector or pGL3-CRNDE with Lipofectamine 2000 for 2 h. Transfected cells were allowed to recover for 24 h. Luciferase activity was then determined with the Luciferase Assay System kit (Promega Cat No. E4030). Briefly cells were lysed in Reporter Lysis Buffer and luminescence was measured immediately after the addition of substrate. Luminescence was normalized to  $\mu\text{g}$  of protein per sample using total protein measured by the Pierce BCA Protein Assay Kit (Thermo Fisher Cat. No. 23225).

### TNF- $\alpha$ treatment

HUVECs were seeded into 35 mm dishes. Cells were treated with 10 ng/mL human TNF- $\alpha$  for 0, 1, 4, 8 or 24 h. CRNDE expression was quantified with qPCR.

### CRNDE overexpression construct

The sequence of CRNDE, accession number NR\_034105 (Supplementary Fig. 5c), was cloned into pUltra<sup>1</sup> to form pUltra-CRNDE. pUltra was a gift from Malcolm Moore (Addgene plasmid # 24129; <http://n2t.net/addgene:24129> ; RRID:Addgene\_24129). Primers are: forward 5'- GATGCTAGCGGGGTCTCGATCGCGCTATT-3' and reverse 5'- TTTTTTTGAACCTTTTTTTTTTCGGATCCGTG-3'.

## Supplementary Figure Legends

### Supplementary Figure 1. mRNA distribution.

**A**, Principal component analysis of the RNA-seq data.

**B**, Chromosomal distribution of the differentially expressed mRNAs.

**C**, Heatmap of all differentially expressed mRNAs.

**D**, CRNDE knockdown reduces expression of ER stress related genes. HUVECs were treated with shNT or shCRNDE for 24 hours. The expression of ATF6, PERK, XBP1 and DDIT3 was examined by qPCR. \* $p < 0.05$ .

### Supplementary Figure 2. Intergenic lncRNA distribution.

**A**, Chromosomal distribution of the differentially expressed lncRNAs.

**B**, Heatmap of all differentially expressed lncRNAs.

### Supplementary Figure 3. Palmitic acid does not change CRNDE promoter activity.

**A**, HUVECs were transduced with the CRNDE promoter-bearing luciferase construct pGL3-CRNDE pro or pGL3, and promoter activity was measured by luciferase activity, with and without stress by palmitic acid. Data shown are representative of two independent experiments with similar trends. Values are mean  $\pm$  SD of triplicates.

**B**, The sequence of cloned CRNDE promoter.

### Supplementary Figure 4. TNF- $\alpha$ does not induce CRNDE.

HUVECs were treated with TNF- $\alpha$  for the indicated time points and CRNDE expression was measured by RT-qPCR. Data shown are mean  $\pm$  SEM from three independent experiments.

### Supplementary Figure 5. CRNDE shRNA effectively reduces CRNDE expression.

HUVECs were transduced with lentiviral shRNA targeting CRNDE and CRNDE expression was measured by RT-qPCR. Data shown are mean  $\pm$  SEM from three independent experiments, \* $p < 0.01$ .

### Supplementary Figure 6. Full scans of p21 and GAPDH detection of representative blot found in Figure 5C.

**Supplementary Figure 7. CRNDE knockdown in HAECs has a similar effect to CRNDE knockdown in HUVECs on endothelial cell migration and tube formation**

**A**, HAECs were treated with the vector pUltra or pUltra-CRNDE for 24 h and then palmitic acid or vehicle control for 12 h before wounding. Images were taken from fixed cells 12 h after wounding. Representative images of 1 experiment is shown. Scale bars are 500  $\mu\text{m}$ .

**B**, Quantification of (A) ( $*p < 0.001$ ). Data is mean  $\pm$  SD from 1 experiment.

**C**, CRNDE knockdown potentiates the inhibitory effects of palmitic acid on tube formation. HAECs were treated as for wound healing before being seeded into Matrigel-coated wells. Images were taken from fixed wells after 3 h. Representative images of 1 experiment shown.

**D**, Quantification of tube formation in (C). Tube length, the number of segments, and the number of nodes.  $*p < 0.05$ ,  $**p < 0.01$ ,  $***p < 0.001$ . Data is mean  $\pm$  SD from 1 experiment.

**E**, Quantification of tube formation in (C). Number of branches ( $*p < 1 \times 10^{-5}$ ). Data is mean  $\pm$  SD from one experiment.

**Supplementary Figure 8. CRNDE lentiviral overexpression construct increases CRNDE expression.**

HUVECs were transduced with pUltra containing CRNDE (pUltra-CRNDE) and CRNDE expression was measured by RT-qPCR

**A**, CRNDE expression. Data is mean  $\pm$  SEM from two independent experiments  $*p < 0.001$ .

**B**, Sequence of the CRNDE gene inserted.

**Supplementary Figure 9. CRNDE overexpression has a similar effect to CRNDE knockdown on endothelial cell migration and tube formation**

**A**, HUVECs were treated with the vector pUltra or pUltra-CRNDE for 24 h and then palmitic acid or vehicle control for 12 h before wounding. Images were taken from fixed cells 12 h after wounding. Representative images of 2 independent experiments were shown. Scale bars are 500  $\mu\text{m}$ .

**B**, Quantification of (A) ( $*p < 0.001$ ). Data is mean  $\pm$  SEM from 2 independent experiments.

**C**, CRNDE knockdown potentiates the inhibitory effects of palmitic acid on tube formation. HUVECs were treated as for wound healing before being seeded into Matrigel-coated wells. Images were taken from fixed wells after 3 h. Representative images of 2 independent experiments were shown.



**D**, Quantification of tube formation in (C). Tube length, the number of segments, and the number of nodes. \* $p < 0.05$ , \*\* $p < 0.01$ , \*\*\* $p < 0.001$ . Data is mean  $\pm$  SEM from 2 independent experiments.

**E**, Quantification of tube formation in (C). Number of branches (\* $p < 0.05$ , \*\* $p < 0.01$ , \*\*\* $p < 1 \cdot 10^{-4}$ ). Data is mean  $\pm$  SEM from 2 independent experiments.

## References

- 1 Lou, E. *et al.* Tunneling nanotubes provide a unique conduit for intercellular transfer of cellular contents in human malignant pleural mesothelioma. *PloS one* **7**, e33093, doi:10.1371/journal.pone.0033093 (2012).

Supplementary Figure 1

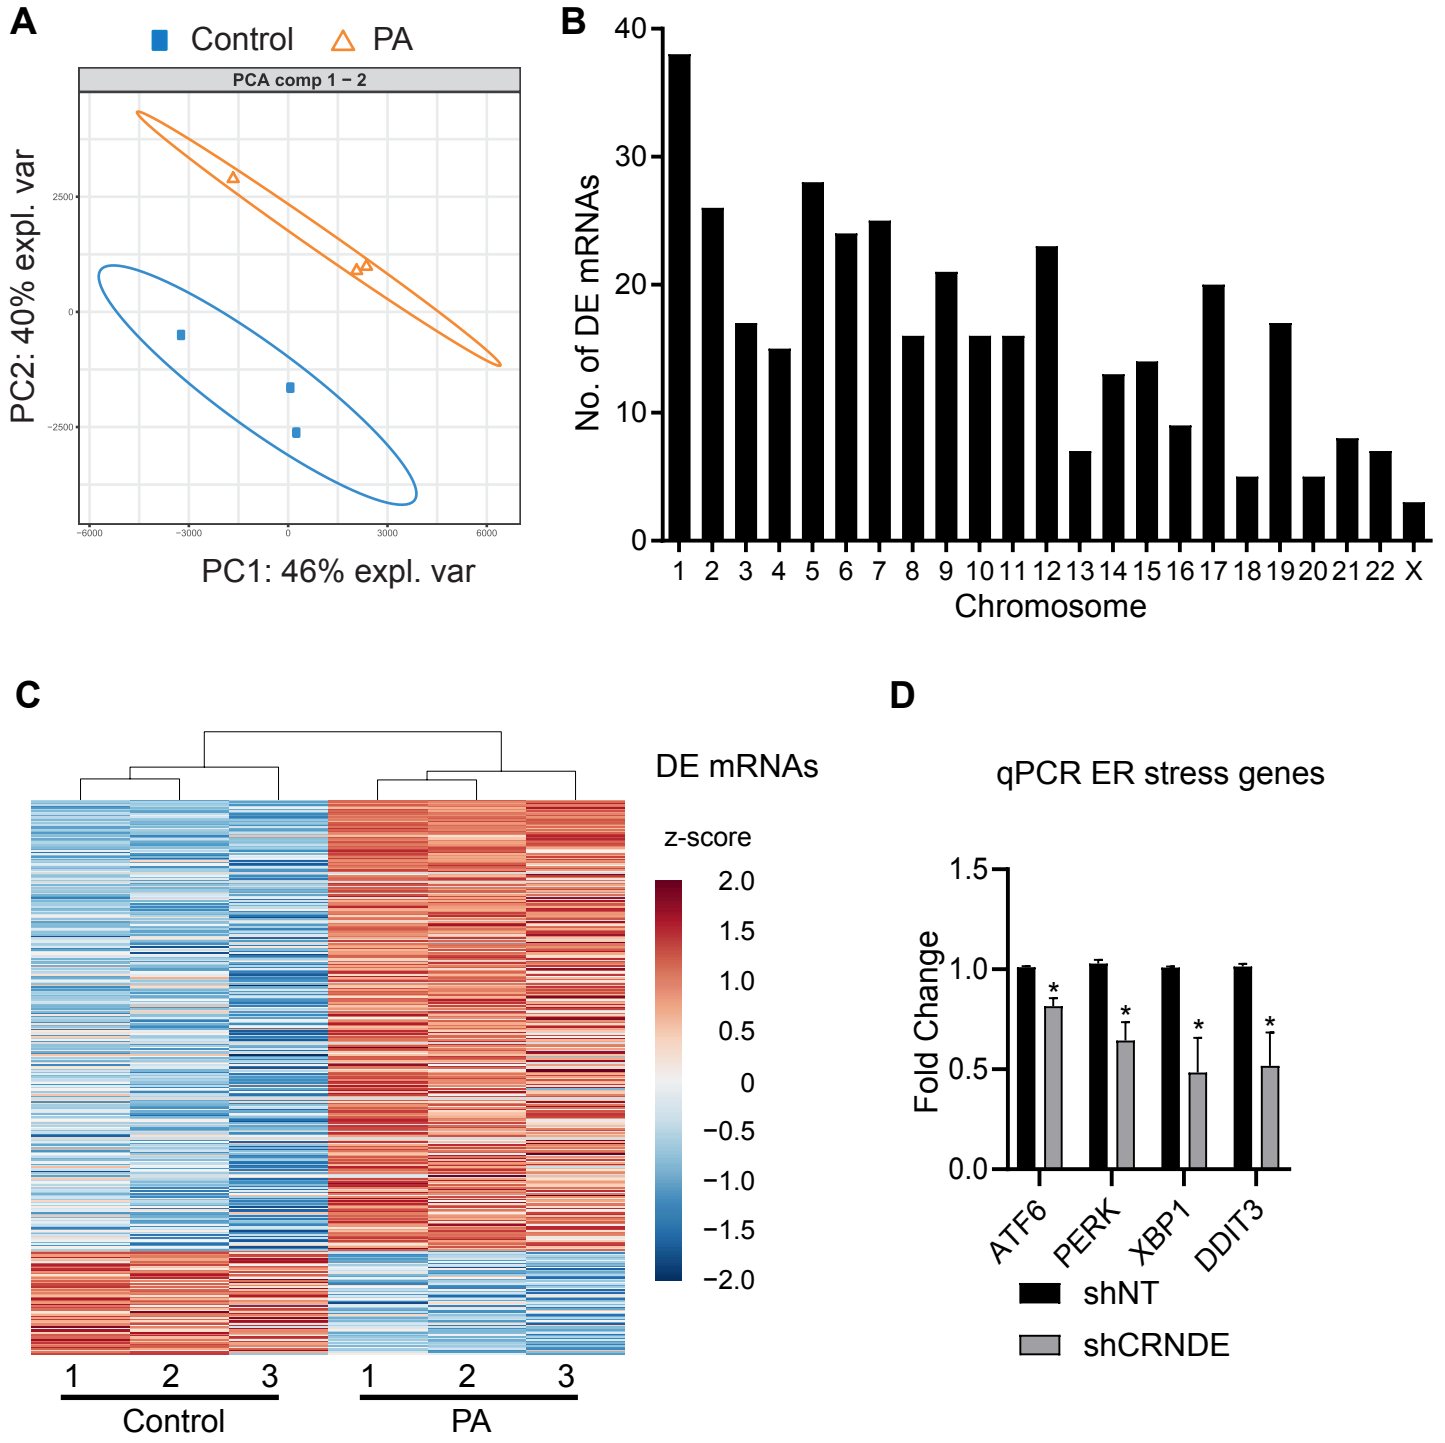

# Supplementary Figure 2

**A**

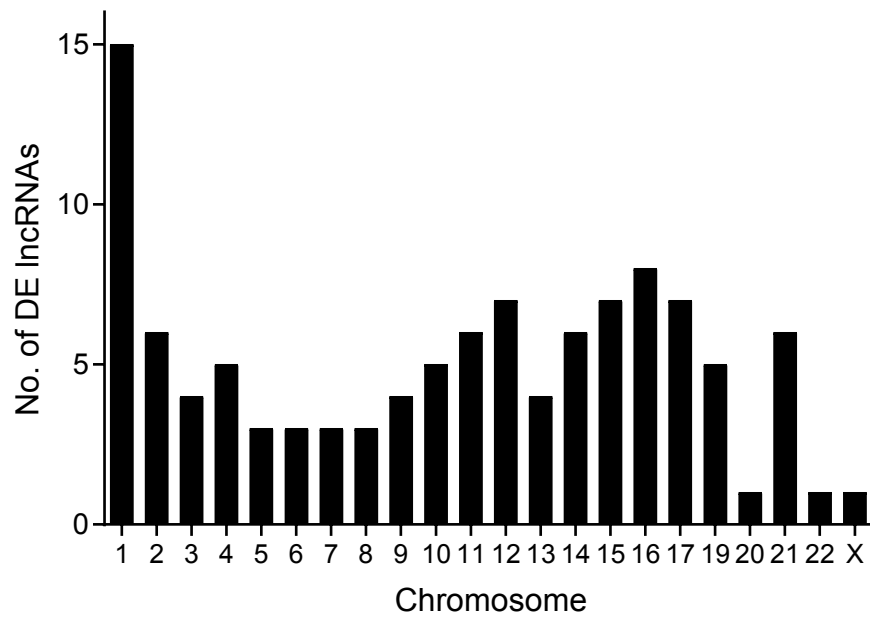

**B**

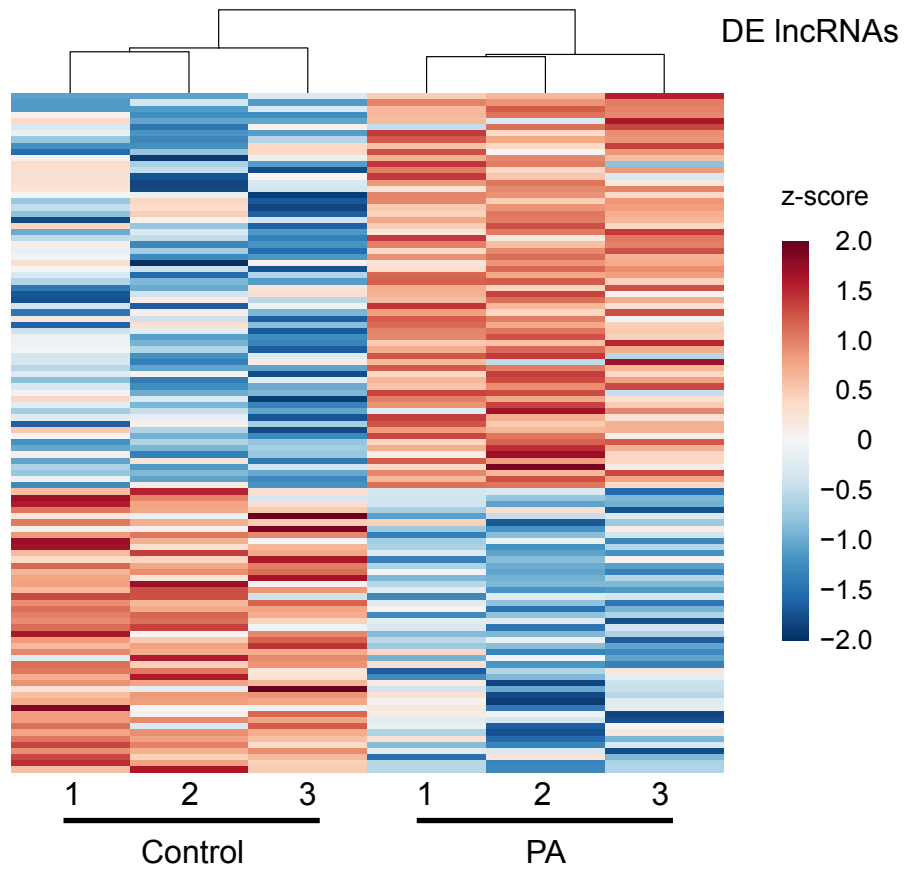

# Supplementary Figure 3

**A**

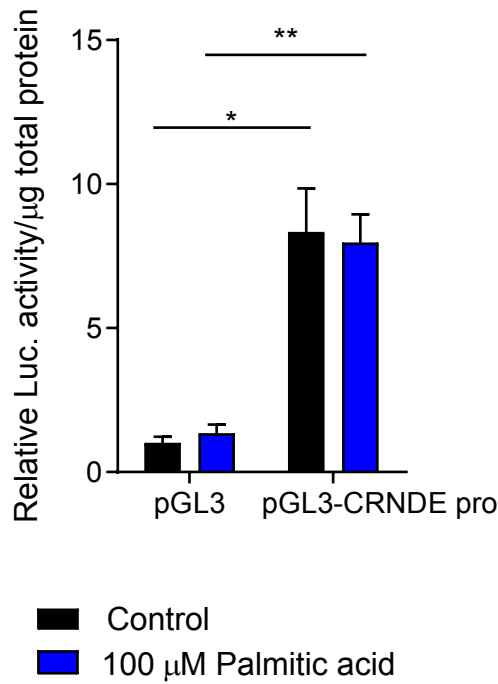

**B**

>CRNDE-promoter sequence

```

GGGGGCTCTGCTTTTGCCTTTGCAAAGGTCCTGCCAAGATGCTAAGTTGAAATTGAGGATTCTGACGCCTTG
TGCGCGCCCGAAGCTCCTCCTTCCCGGGGTGTAGTCGGTGGGAGGACTGGCAGGAGCTTCTGGGCGCCGCAG
CCAACCCGGCCGCCAGGCGCGCCTCGCCCTCTCCCTCTTCTCCTCGGCTCTCTCTCCCGCTCGCTGGCGCTC
CTCTCGCCCCCTCCCTAGCGCCCGCCTCCCTCCGCGGCCCCCTCTCACCCCTCTCTTTGCCTCCCCTTTT
CCCCCTCCCGGTCTCTCCCTCTCTCTCGCTTTCTCTCAGACTCTCGAGCGCCGGCCCCAGGATGACAATCACA
TCCCAGGAGCGCCGATCTCTTCCAACCTTTCTCTTCTGCTAACTCGGGGCGGAGTGGCAGTCCCAGCCGCCCCG
AAGCACAAGGGAACGAGGCCGCGGGCTGTGCGCCGGCGAACGCTCTGCGCTCTCCTAGCCACAGTAGATCGC
GGACTTAGCGGATTTCTTGTCTCCGGCAGGCTGGGCTCCGAGGCCATTCTGTTGCCACCCCCCTCTGGCGTC
TTCCCCAAGCCAGGGGGCCGGAGAGCCAGCTGGAGATCCGGAATGAAAGTCTCTGGGAGAGCCGATGGATGG
CCCAGCCAGGGCGCAGGAAGTCCGGGATGACTGCCCTCTGCGCCGGCAGCAGGAGTGGGCGAGAGACAG
GCCTCAGACGTCTGCACGTCTCCGCTCGCCTTCTTCTACCGACCCCCCGCCGACGGCGAGGGAGAAGACA
CTGGTTTCTGGAACCTACGGGGTAGCCTTTTTCTAGAGTAGGGTGGTGGGCAAGAACTGCCAGACAGAGAAT
CAGCTACACCCGAGGAGATCTCGGGACCGTCCCAGCTCCACTCCCACGCCTCGCAGCCTCTTCTCCCGGTT
TTCCACCCGACGCAGCTCGCACCGCCAAGTCGGTGGTGGTGGAGGGTGCAGGGTCCCCTTCCCTTTTGTAA
CTAAGTCGCCTTCCCCTTCGCACGCACTCTCGCATCCGCCACGCTCCACTGCAAACACTGGGCAGAGCAGTG
CCCAACCCAACCACTGTTTGTTCAGCGAGGCGCTGGCGAAGCAAACACACAACCTGAGTCAGAGGCAGAGCC
CTTGCCACAGACGGCCACACAGTTAGAATACAAAACAGACCCTCTCCTCTTCTCTCCACCTCCCAGCCACACA
AGCCACGGACGCACTCGAACTCTGGGACAGACAGGGGCGCTGGTGAACCAGGACAGAAGATGGCACAGGTTTG
GGCAGCCCGGGAAGCTCGGGATATCGGGAACCTCGCATAATGGGGCCACACGCAAGCCGAAGCATAACTATA
TACAAAGTTTCTCGCATTGACTTTGACGGGCGAGATGTACTTTATTTTCGCGATCTCACACTAACCCAGCGCCG
CACCAGCCACCCGCTCGGTGCTGCGCTCTCGTGACGCGGTTGGCTCCTCCCCTCCGTCTGCTCCCCTCCCC
AGACACCGCCACCAAGAGGCTGAGCGGTTTACACTACATTCTCCGAGAGCCCTGGGTCCGCCCAGCCAG
TGCCTGACACCTCCTTACCTATGATTGGGCGCTGGCCTCCCTGGGCTCCGCCCCCTGGTGACGTAACCCCGC
TTTCTCCGAGTCTCGGCGCCAGAGGGGCGGGGAGGGGCGGGTCTCGATCGCGCTATTGTCATGGAGACGGG
AAGCTGGCT
    
```

# Supplementary Figure 4

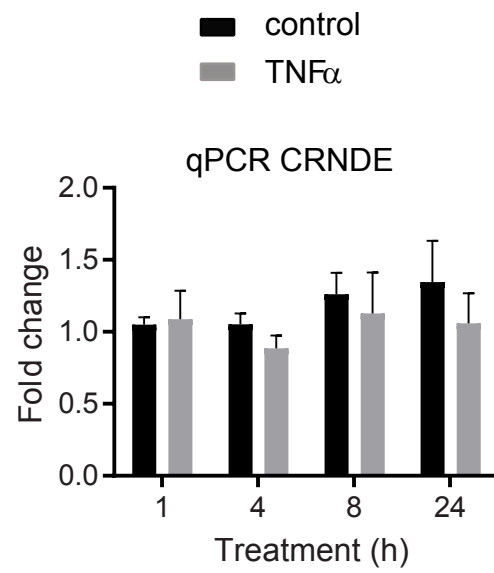

## Supplementary Figure 5

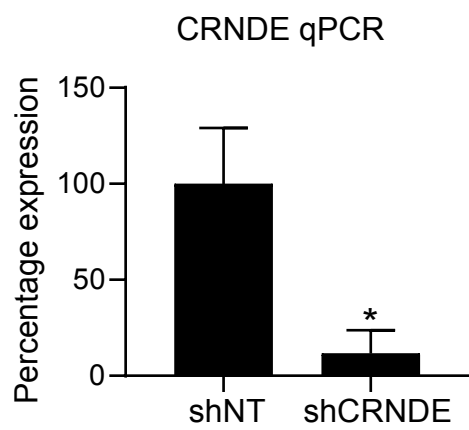

Supplementary Figure 6

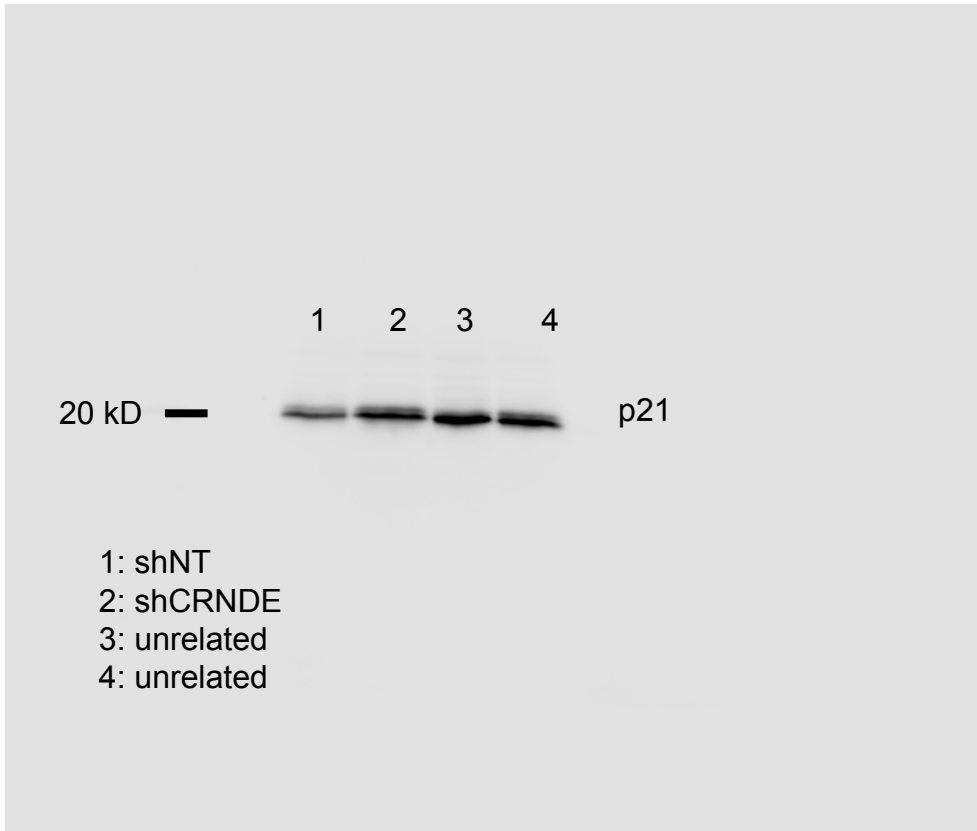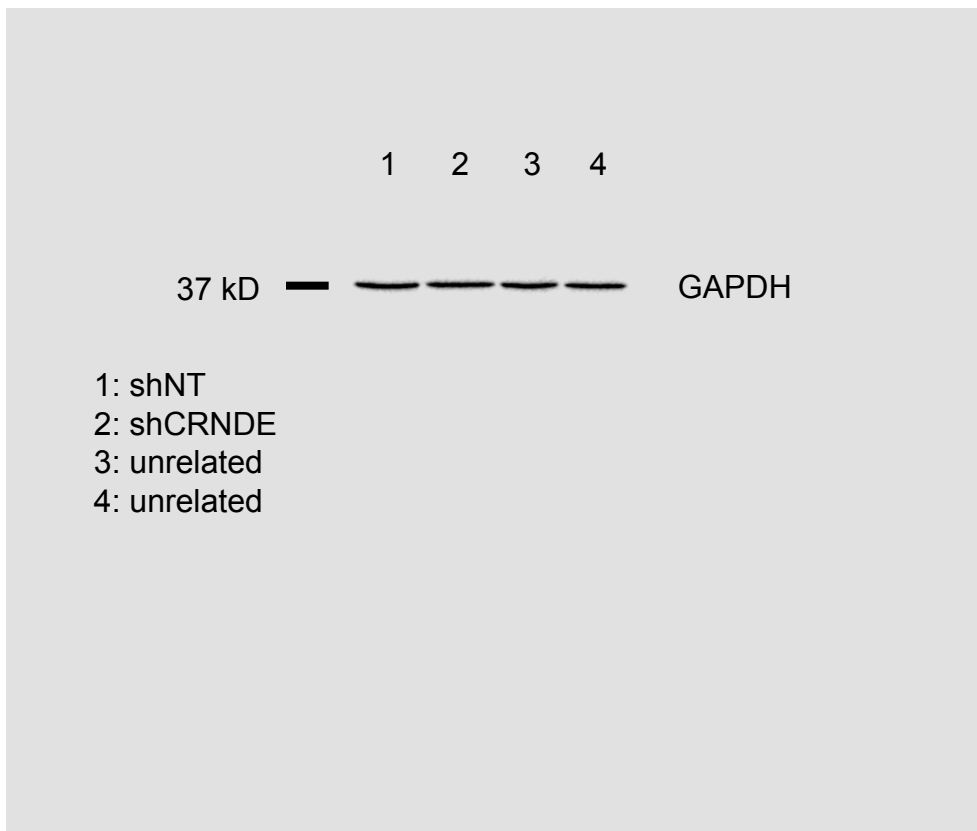

# Supplementary Figure 7

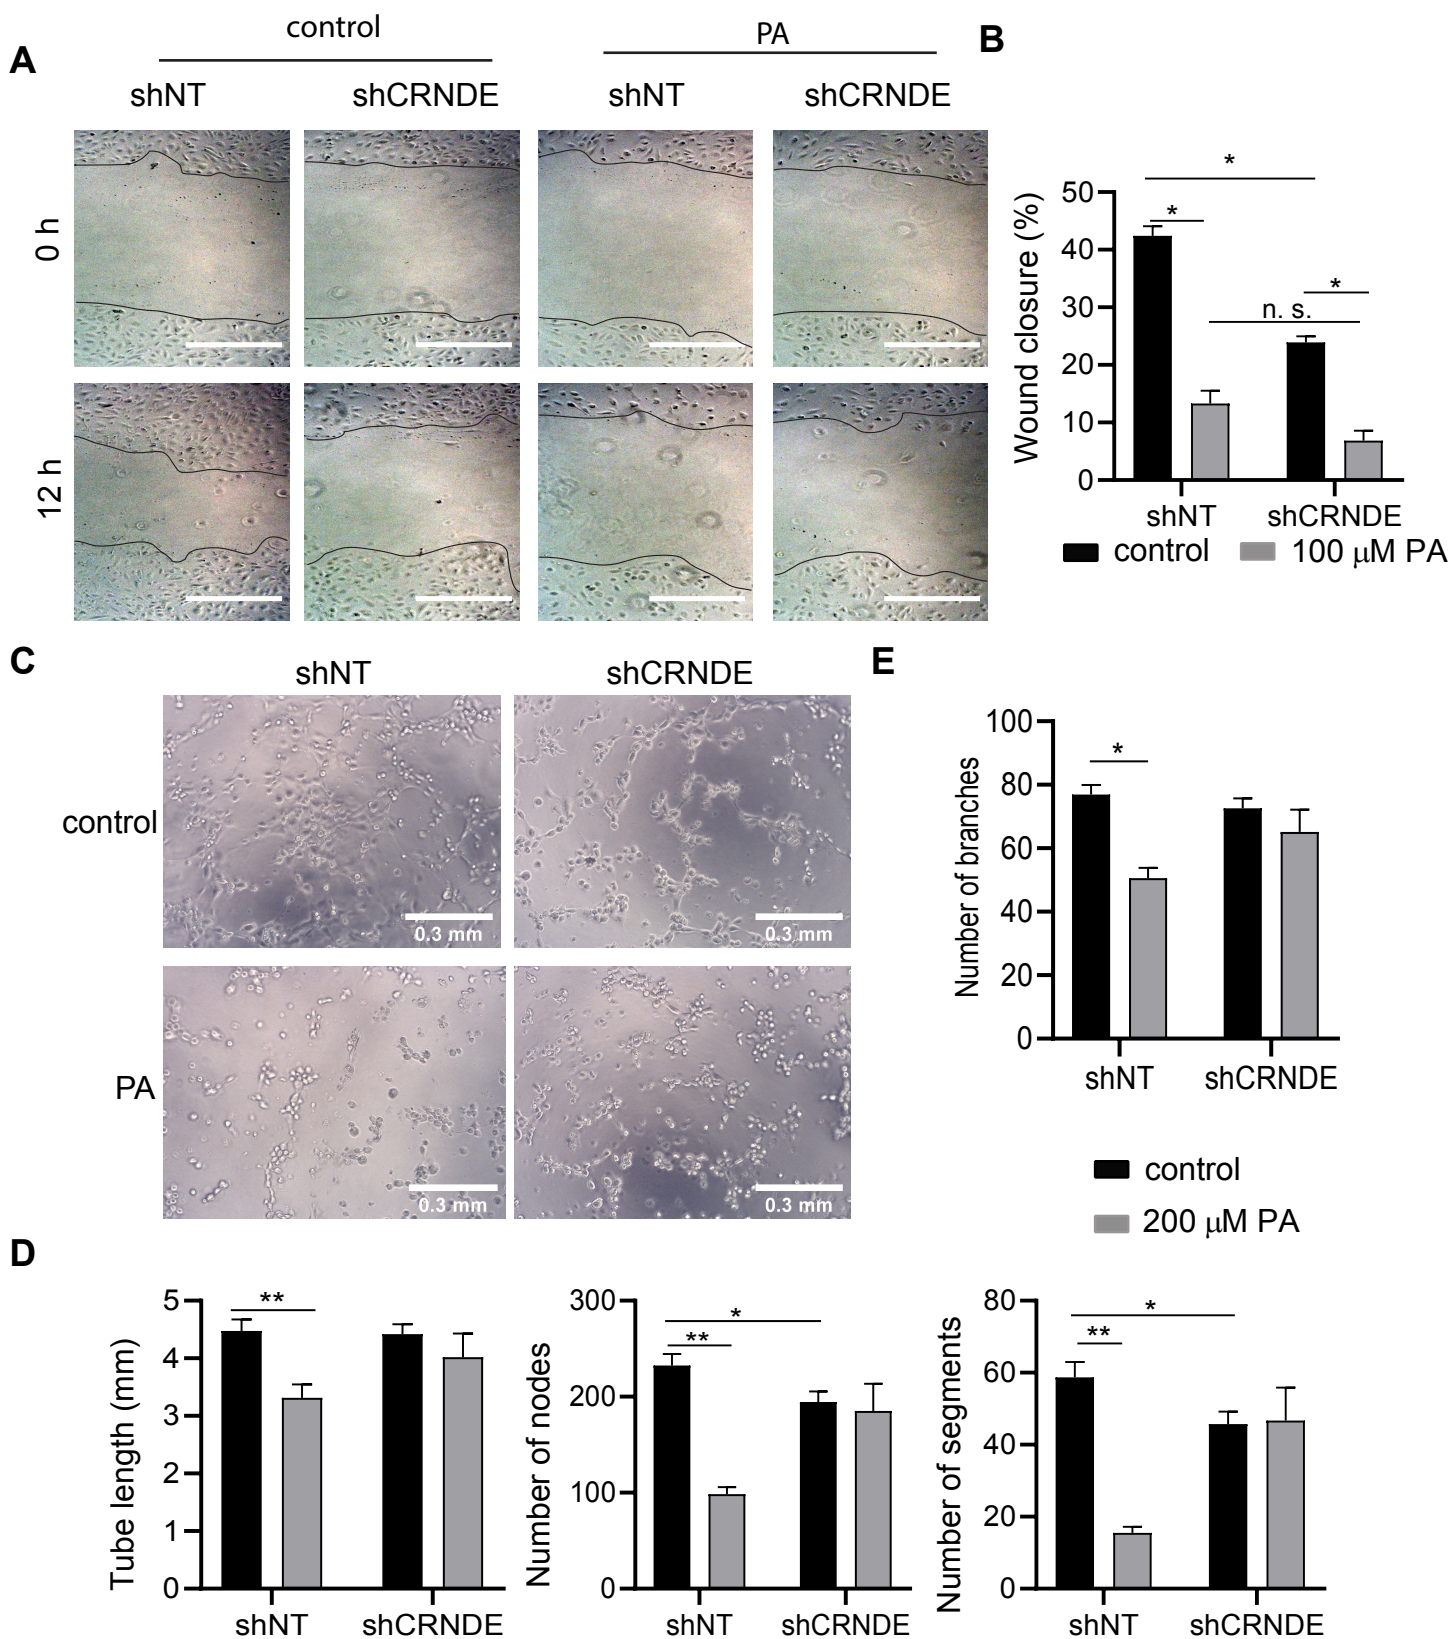



# Supplementary Figure 8

**A**

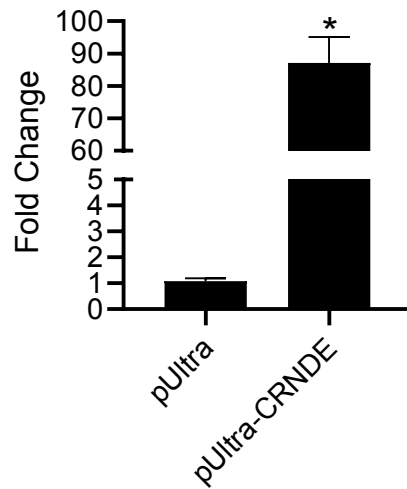

**B**

> CRNDE sequence

```
GGGGTCTCGATCGCGCTATTGTCATGGAGACGGGAAGCTGGCTGCAGCGGCGGGGACCGTGGGGCCGAGGT
GGCTGCCAGCCGGCCAATGTCTAAGCGAGGCGGAGCGGCCAGGCGGCCCGAGCCTGGGGGAGCGCGCAGCCGG
CCAGTGGCGGCCTCGCCGGCGGCCTCTTCCCGGGCTCGCAGTAGGCCCGAGTCGTCGCCGGGAGCTCCTGGGAG
CAGCGTCCCCGCCCTGCTCCCCCTCGCTCCCGCCTCTTGCGGGCCCCACGGCCCCCTCAGCGCCCCGCCCGGGCTCC
GCCCCCGCAGCCGCAGCCCCCTGGCGCTAACGGTCGGTAACGGCCCCGCGCGCGCCGCCCGGGGGCTCGCGC
CAGCCACGAGGGAGCGTCCGCGGCCCGCGCGCCCCGCGCGGCGGAGGAGAGGTGTTAAGTGTGATGCTTCCATAA
TACATTTGGATGCTGTCAGCTAAGTTCACCTTCTGAACTAAGGGGTTCCCTCCAAATGTTGGCTGAAATTCATCCC
AAGGCTGGTCTGCAAAGTCTGCAATTCATAATGGAGCTACTGTACTGGCTATTGGAAGGAGGAGATTCTGAAGA
TAAGGAGGTAAAACCTGTTTAGAAATTAATAATGAGTTACGATTTAAAGAAAATTCAGATGACTCATTGTGAGT
GCTAGTTCTCTTGTAGGATGCCACTGGAAATGTTGAAATGAAAAATATTCAGCCGTTGGTCTTTGAAATTTCTT
GTGATGTGTTTCAATCTAGATGCAAAGAACATGGAAAAATCAAAGTGCTCGAGTGGTTTAAATATGTTTTGGGT
ATTCCTGTTTATAGACTATAATACTTTTCCAATTAATAATCCTCAGTTGTCACGCAGAAGAAGTTAAGCTGTAT
TTGATTGCCAGTTTTACTGAAAATGCTTAGTATTTTACAGTATCACCAAATATATTTTGTGTTAGCCAAGGTATA
GGAAAAATAAAATAAATTTGATAGGTTGACTTTTTTCTAAAATGTCTTTATTGGATTGAATGAATGTTTATACC
TGAAAAAAAAGGTTCAAAAAA
```

# Supplementary Figure 9

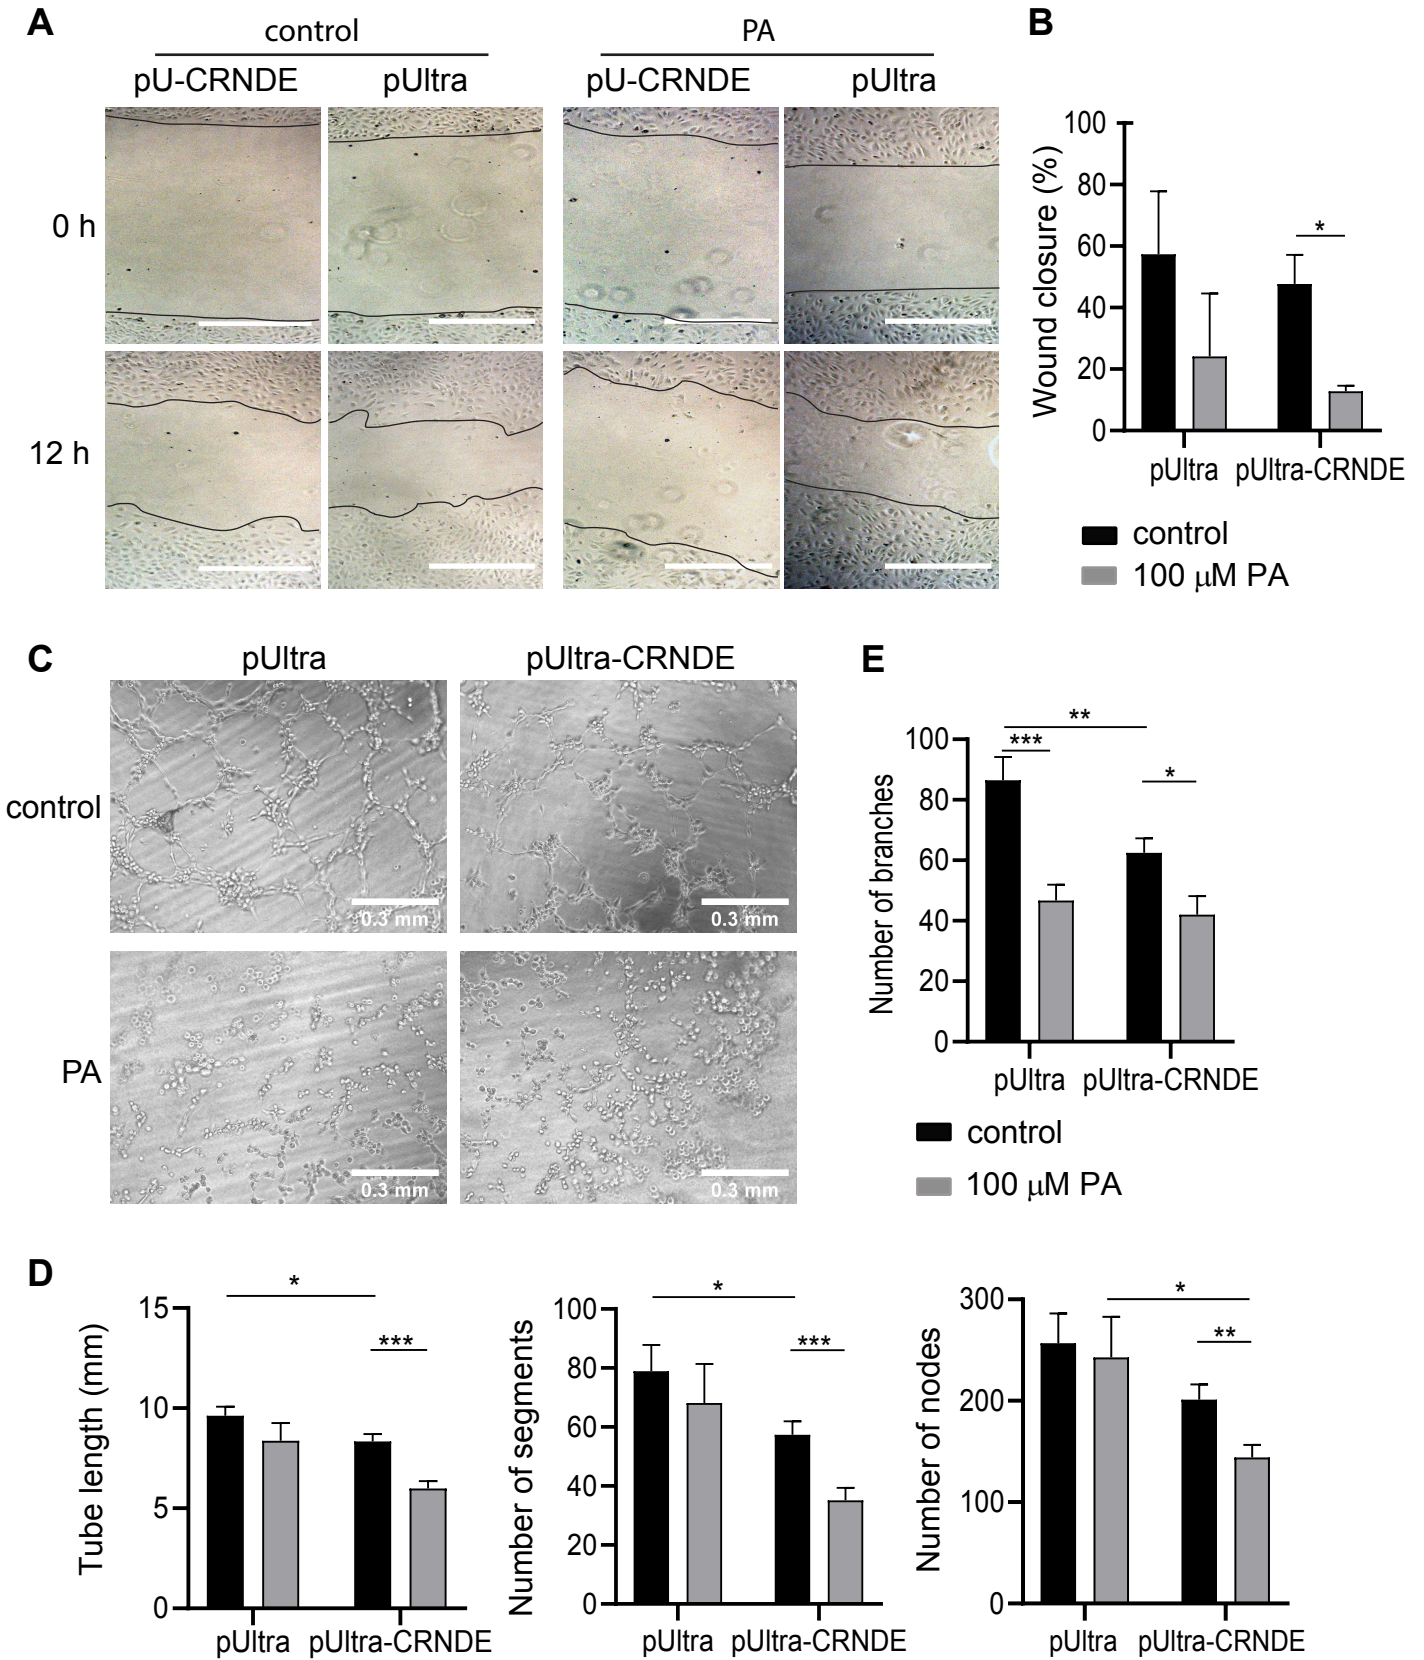

Supplementary Table 1. Alignment of reads to human genome by Tophat2.

| Treatment | Replicate | Total Reads | Primary Aligned Reads | % Mapped Reads | % Paired Reads |
|-----------|-----------|-------------|-----------------------|----------------|----------------|
| Control   | 1         | 59,840,381  | 51,756,846            | 100.00 %       | 84.55 %        |
|           | 2         | 67,122,243  | 57,707,780            | 100.00 %       | 82.84 %        |
|           | 3         | 57,910,765  | 50,544,790            | 100.00 %       | 81.29 %        |
| PA        | 1         | 80,309,248  | 68,965,663            | 100.00 %       | 82.66 %        |
|           | 2         | 63,759,201  | 55,104,070            | 100.00 %       | 82.18 %        |
|           | 3         | 79,760,115  | 69,144,774            | 100.00 %       | 81.78 %        |

Supplementary Table 2. CRNDE CPM values

| Replicate      | BSA   | PA     |
|----------------|-------|--------|
| 1              | 3.02  | 5.23   |
| 2              | 3.17  | 5.18   |
| 3              | 2.70  | 4.21   |
| Average Counts | 224.0 | 608.67 |

Supplementary Table 3. Differentially Expressed lncRNAs.

| Ensembl         | Gene Symbol    | logFC | PValue                 |
|-----------------|----------------|-------|------------------------|
| ENST00000427169 | RP11-495P10.5  | 4.15  | $1.95 \times 10^{-3}$  |
| ENST00000530576 | RP11-266A24.1  | 3.99  | $4.70 \times 10^{-4}$  |
| ENST00000544086 | RP11-253I19.3  | 3.90  | $1.10 \times 10^{-3}$  |
| ENST00000566370 | LINC00563      | 3.46  | $7.42 \times 10^{-4}$  |
| ENST00000417975 | RP11-475O6.1   | 3.29  | $2.57 \times 10^{-2}$  |
| ENST00000434245 | RP11-495P10.8  | 3.22  | $4.61 \times 10^{-3}$  |
| ENST00000565305 | RP11-1006G14.2 | 2.91  | $9.52 \times 10^{-4}$  |
| ENST00000564531 | RP11-1100L3.8  | 2.79  | $1.82 \times 10^{-10}$ |
| ENST00000507248 | RPL34-AS1      | 2.61  | $2.90 \times 10^{-2}$  |
| ENST00000435368 | AC023481.1     | 2.39  | $2.46 \times 10^{-2}$  |
| ENST00000417096 | AC007879.2     | 2.27  | $1.93 \times 10^{-3}$  |
| ENST00000568695 | RP11-92G12.3   | 2.26  | $2.94 \times 10^{-2}$  |
| ENST00000568752 | RP11-989E6.10  | 2.20  | $1.22 \times 10^{-2}$  |
| ENST00000563464 | RP11-1006G14.1 | 2.18  | $4.35 \times 10^{-2}$  |
| ENST00000433770 | RP11-472N13.3  | 2.18  | $1.44 \times 10^{-2}$  |
| ENST00000442815 | AP001046.5     | 2.13  | $2.11 \times 10^{-2}$  |
| ENST00000612592 | RP11-711K1.8   | 2.08  | $2.10 \times 10^{-2}$  |
| ENST00000530725 | LINC01301      | 2.03  | $2.28 \times 10^{-2}$  |
| ENST00000441947 | LINC00315      | 2.03  | $1.54 \times 10^{-2}$  |
| ENST00000623723 | CH507-39O4.2   | 2.01  | $2.38 \times 10^{-2}$  |
| ENST00000611780 | RP11-157L3.12  | 1.90  | $2.37 \times 10^{-3}$  |
| ENST00000556370 | RP3-449M8.6    | 1.87  | $1.93 \times 10^{-2}$  |
| ENST00000606542 | RP1-136B1.1    | 1.84  | $2.16 \times 10^{-2}$  |
| ENST00000588501 | LINC01483      | 1.80  | $4.26 \times 10^{-3}$  |
| ENST00000573042 | LINC01569      | 1.73  | $1.75 \times 10^{-2}$  |
| ENST00000450760 | RP11-211G3.2   | 1.68  | $1.66 \times 10^{-2}$  |
| ENST00000366713 | IBA57-AS1      | 1.67  | $2.83 \times 10^{-2}$  |
| ENST00000444330 | RP11-527D7.1   | 1.64  | $4.28 \times 10^{-2}$  |
| ENST00000612269 | CTD-2553L13.10 | 1.59  | $1.56 \times 10^{-2}$  |
| ENST00000513492 | LUCAT1         | 1.57  | $7.35 \times 10^{-6}$  |
| ENST00000507639 | RP11-328N19.1  | 1.52  | $2.40 \times 10^{-5}$  |

| Ensembl         | Gene Symbol    | logFC | PValue                |
|-----------------|----------------|-------|-----------------------|
| ENST00000558082 | LINC01583      | 1.50  | $1.13 \times 10^{-3}$ |
| ENST00000526605 | RP11-347E10.1  | 1.48  | $2.94 \times 10^{-2}$ |
| ENST00000421848 | RP11-374M1.4   | 1.44  | $9.67 \times 10^{-3}$ |
| ENST00000509098 | RP11-663P9.1   | 1.40  | $3.00 \times 10^{-2}$ |
| ENST00000541888 | RP1-102E24.8   | 1.30  | $1.05 \times 10^{-2}$ |
| ENST00000417335 | AF064858.8     | 1.28  | $1.06 \times 10^{-2}$ |
| ENST00000565506 | RP11-354I13.2  | 1.25  | $1.30 \times 10^{-2}$ |
| ENST00000570130 | RP11-480A16.1  | 1.14  | $1.36 \times 10^{-2}$ |
| ENST00000608792 | LINC00702      | 1.12  | $8.24 \times 10^{-5}$ |
| ENST00000608917 | PACERR         | 1.12  | $4.81 \times 10^{-3}$ |
| ENST00000454935 | OLMALINC       | 1.01  | $6.68 \times 10^{-4}$ |
| ENST00000607414 | RP11-1017G21.5 | 1.00  | $4.38 \times 10^{-2}$ |
| ENST00000562493 | CTC-459F4.1    | 1.00  | $3.43 \times 10^{-2}$ |
| ENST00000602927 | RP11-646I6.5   | 0.97  | $2.57 \times 10^{-2}$ |
| ENST00000609602 | LINC00896      | 0.96  | $4.43 \times 10^{-2}$ |
| ENST00000603468 | RP11-359E10.1  | 0.96  | $1.44 \times 10^{-3}$ |
| ENST00000454981 | LINC01611      | 0.93  | $4.23 \times 10^{-3}$ |
| ENST00000397841 | LINC01547      | 0.86  | $3.15 \times 10^{-2}$ |
| ENST00000605249 | RP11-138A9.1   | 0.86  | $2.87 \times 10^{-2}$ |
| ENST00000608412 | RP11-138A9.2   | 0.83  | $9.05 \times 10^{-4}$ |
| ENST00000542475 | C17orf100      | 0.83  | $2.02 \times 10^{-2}$ |
| ENST00000447748 | LINC01359      | 0.81  | $2.72 \times 10^{-2}$ |
| ENST00000452366 | RP3-471M13.2   | 0.81  | $2.30 \times 10^{-2}$ |
| ENST00000605834 | RP11-326I11.3  | 0.78  | $3.74 \times 10^{-2}$ |
| ENST00000623180 | RP11-1228E12.1 | 0.75  | $1.65 \times 10^{-3}$ |
| ENST00000501177 | CRNDE          | 0.75  | $9.31 \times 10^{-4}$ |
| ENST00000603682 | RP1-142L7.9    | 0.72  | $5.61 \times 10^{-4}$ |
| ENST00000466430 | RP11-34P13.7   | 0.72  | $2.04 \times 10^{-2}$ |
| ENST00000437712 | RP11-168K11.3  | 0.72  | $2.62 \times 10^{-2}$ |
| ENST00000567401 | RP11-105C19.2  | 0.67  | $4.60 \times 10^{-2}$ |
| ENST00000592431 | CTD-2538C1.2   | 0.67  | $3.44 \times 10^{-2}$ |
| ENST00000499986 | AC138035.2     | 0.64  | $2.16 \times 10^{-3}$ |
| ENST00000534991 | URB1-AS1       | 0.61  | $3.86 \times 10^{-2}$ |
| ENST00000566990 | CTD-2515H24.4  | -0.61 | $3.33 \times 10^{-2}$ |
| ENST00000572818 | RP11-160E2.11  | -0.61 | $3.40 \times 10^{-2}$ |
| ENST00000418344 | RP5-1070A16.1  | -0.67 | $3.31 \times 10^{-3}$ |
| ENST00000613696 | AC000403.4     | -0.69 | $4.59 \times 10^{-2}$ |
| ENST00000556652 | CTD-2207P18.2  | -0.72 | $4.86 \times 10^{-2}$ |
| ENST00000569740 | CTD-2015G9.2   | -0.76 | $4.96 \times 10^{-2}$ |
| ENST00000532350 | MIR100HG       | -0.78 | $4.21 \times 10^{-2}$ |
| ENST00000429227 | RP5-1061H20.4  | -0.87 | $2.53 \times 10^{-2}$ |
| ENST00000588040 | CTD-2528L19.6  | -0.91 | $3.45 \times 10^{-2}$ |
| ENST00000443576 | RP11-141M1.1   | -0.92 | $2.34 \times 10^{-2}$ |
| ENST00000596623 | ZNF888         | -0.93 | $3.24 \times 10^{-3}$ |
| ENST00000623515 | LINC01126      | -0.98 | $2.62 \times 10^{-2}$ |
| ENST00000443779 | LINC00961      | -0.99 | $6.98 \times 10^{-6}$ |
| ENST00000415504 | EWSAT1         | -1.00 | $7.02 \times 10^{-3}$ |
| ENST00000563734 | RP11-304L19.13 | -1.04 | $3.23 \times 10^{-2}$ |
| ENST00000565617 | KB-1460A1.5    | -1.04 | $5.75 \times 10^{-3}$ |
| ENST00000311067 | RP11-89N17.1   | -1.06 | $1.19 \times 10^{-3}$ |
| ENST00000442355 | RP11-160E2.17  | -1.09 | $2.21 \times 10^{-2}$ |
| ENST00000554829 | RP11-356O9.1   | -1.09 | $1.70 \times 10^{-2}$ |
| ENST00000455974 | AC123023.1     | -1.09 | $4.45 \times 10^{-2}$ |
| ENST00000588041 | RP1-193H18.2   | -1.14 | $9.49 \times 10^{-6}$ |
| ENST00000355358 | GATA3-AS1      | -1.16 | $2.65 \times 10^{-3}$ |

| Ensembl         | Gene Symbol    | logFC | PValue                |
|-----------------|----------------|-------|-----------------------|
| ENST00000443092 | SACS-AS1       | -1.21 | $4.13 \times 10^{-2}$ |
| ENST00000433133 | AC078941.1     | -1.23 | $2.48 \times 10^{-2}$ |
| ENST00000436756 | LINC01347      | -1.25 | $2.94 \times 10^{-2}$ |
| ENST00000558245 | RP11-462P6.1   | -1.30 | $8.30 \times 10^{-3}$ |
| ENST00000549830 | LINC00592      | -1.35 | $2.01 \times 10^{-2}$ |
| ENST00000608273 | RP11-318E3.9   | -1.36 | $2.34 \times 10^{-2}$ |
| ENST00000557526 | RP11-7F17.3    | -1.43 | $1.39 \times 10^{-2}$ |
| ENST00000574293 | CTC-786C10.1   | -1.50 | $3.48 \times 10^{-2}$ |
| ENST00000503695 | RP11-46H11.3   | -1.58 | $1.63 \times 10^{-2}$ |
| ENST00000529252 | FAM66E         | -1.59 | $5.50 \times 10^{-3}$ |
| ENST00000452690 | RP11-320G24.1  | -1.62 | $3.07 \times 10^{-2}$ |
| ENST00000602396 | RP6-91H8.5     | -1.63 | $2.04 \times 10^{-2}$ |
| ENST00000445039 | RP4-784A16.5   | -1.81 | $3.82 \times 10^{-2}$ |
| ENST00000533106 | AP001257.1     | -1.86 | $4.94 \times 10^{-2}$ |
| ENST00000618746 | RP11-370I10.11 | -2.01 | $2.97 \times 10^{-2}$ |
| ENST00000606089 | CTB-113I20.2   | -2.05 | $6.98 \times 10^{-4}$ |
| ENST00000608316 | RP11-367H1.1   | -2.22 | $3.22 \times 10^{-2}$ |
| ENST00000623351 | RP5-1198O20.4  | -2.31 | $2.64 \times 10^{-3}$ |
| ENST00000565944 | RP11-111J6.2   | -2.33 | $1.24 \times 10^{-2}$ |
| ENST00000591705 | RP11-434D2.3   | -2.36 | $4.76 \times 10^{-5}$ |
| ENST00000428495 | RP4-644L1.2    | -2.58 | $4.77 \times 10^{-3}$ |
| ENST00000631132 | CH17-132F21.5  | -2.75 | $8.41 \times 10^{-3}$ |
| ENST00000531511 | RP11-672A2.4   | -3.21 | $8.91 \times 10^{-3}$ |
| ENST00000568345 | RP11-1007O24.2 | -3.23 | $1.23 \times 10^{-2}$ |

Supplementary Table 4. Primer sequences for qPCR

| Primer  | Sequence                  |
|---------|---------------------------|
| ATF6-f  | TCGGTCAGTGGACTCTTAT       |
| ATF6-r  | CCAGTGACAGGCTTATCTTC      |
| CRNDE-f | ACTGGCTATTGGAAGGAGGAGA    |
| CRNDE-r | GGCATCCTACAAGAGAACTAGCAC  |
| DDIT3-f | GGTATGAGGACCTGCAAGAGGT    |
| DDIT3-r | CTTGTGACCTCTGCTGGTTCTG    |
| HMOX1-f | ACTCCCTGGAGATGACTCCC      |
| HMOX1-r | TCTTGCACTTTGTTGCTGGC      |
| PERK-r  | CCATACTACAAGAGGGAGAGGAACA |
| PERK-f  | TGGGTTGTCGAGGAATCTGACT    |
| VEGFA-f | TGCTGTGGACTTGAGTTGGGAG    |
| VEGFA-r | CCTGGCCTTGCACATTCCTG      |
| XBP1-f  | CTGAGTCCGAATCAGGTGCAG     |
| XBP1-r  | ATCCATGGGGAGATGTTCTGG     |
